# Supplementary material
Source: PubMed Central journal article supplement (PMC5586500)
Supplement: NIHMS896169-supplement-2.pdf [file NIHMS896169-supplement-2.pdf]

A

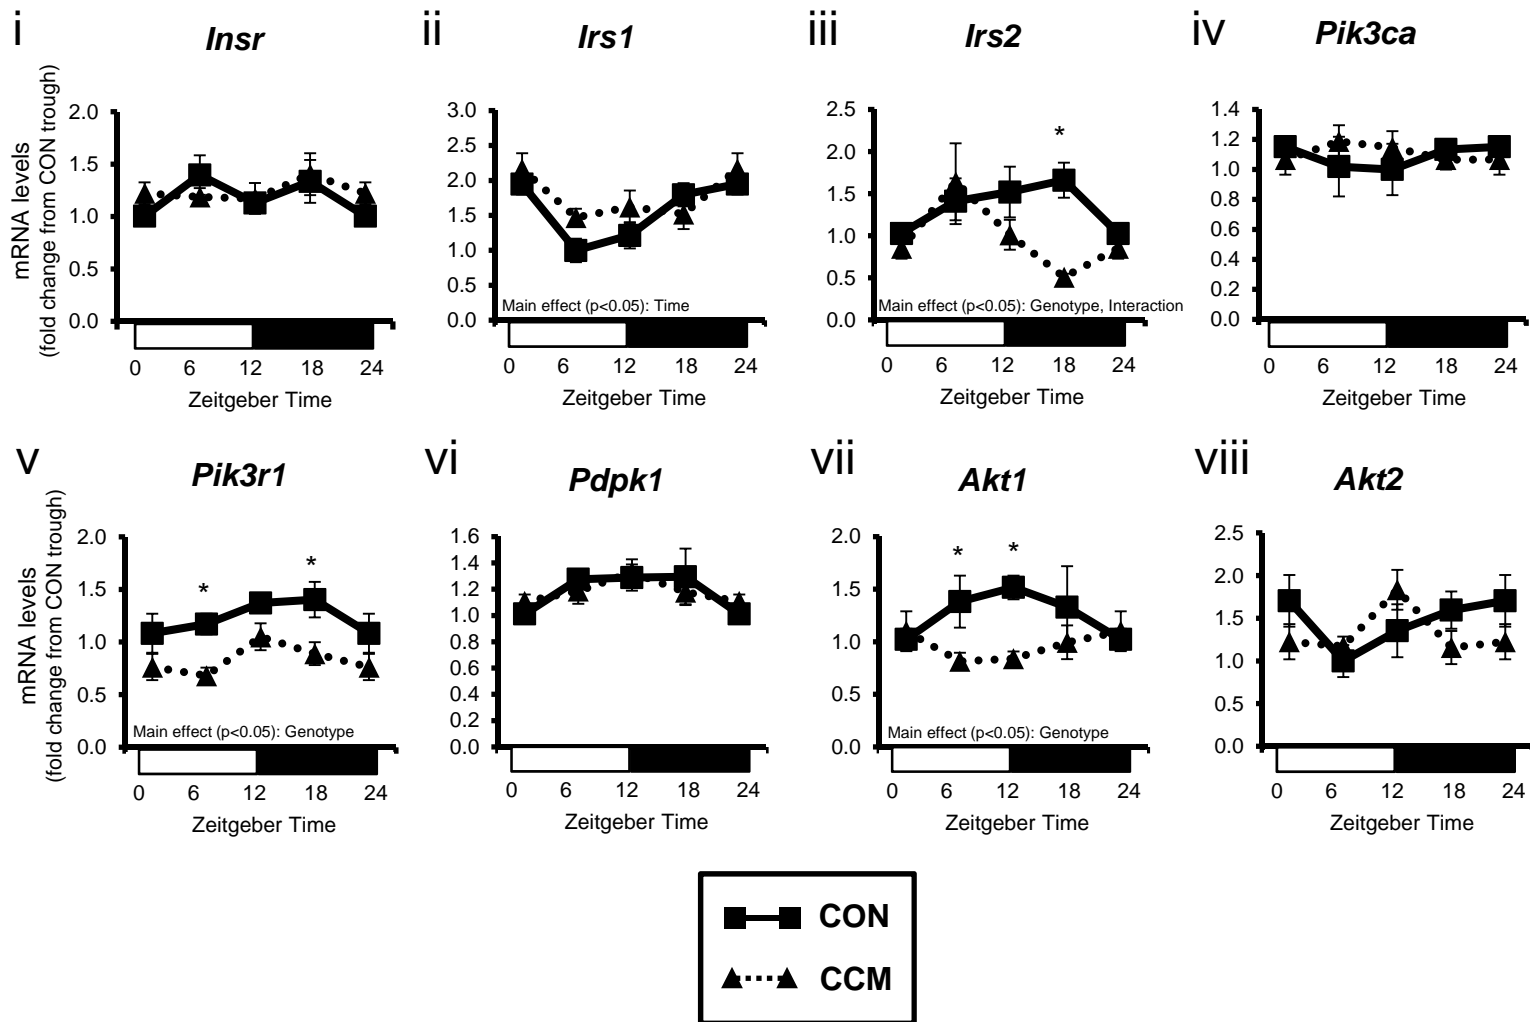

Supplemental Figure 1A

B

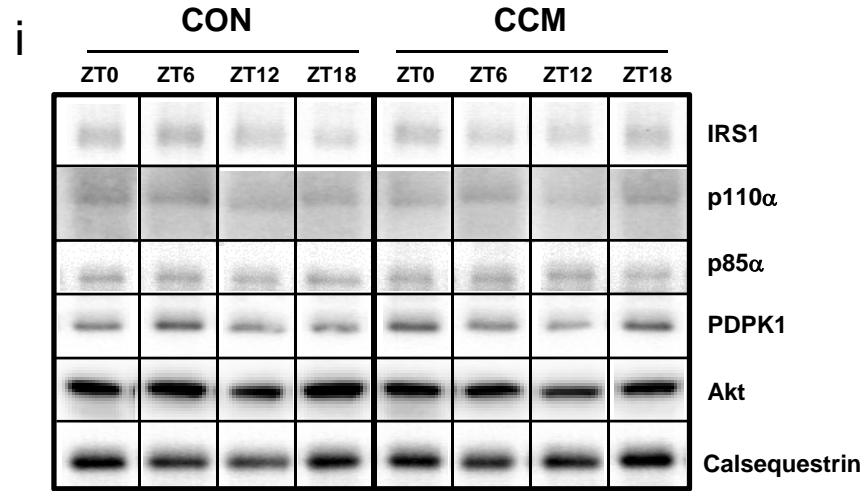

ii

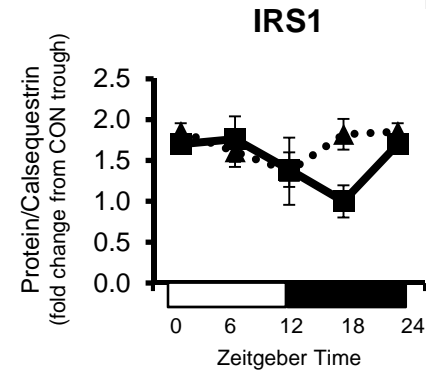

iii

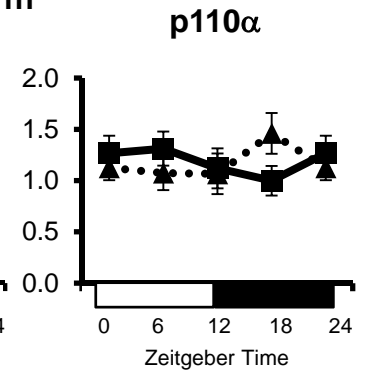

iv

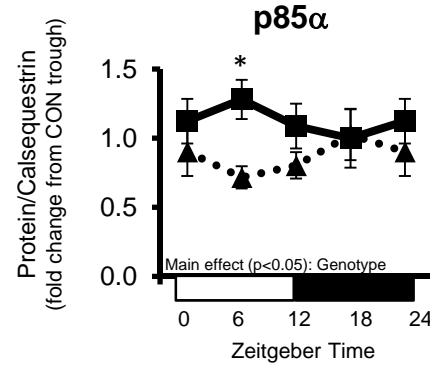

v

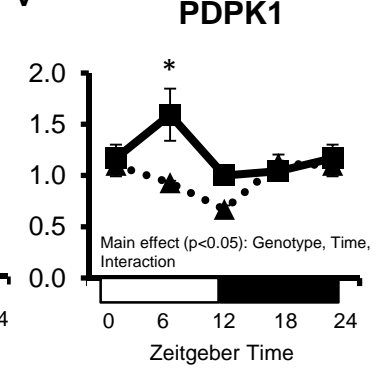

vi

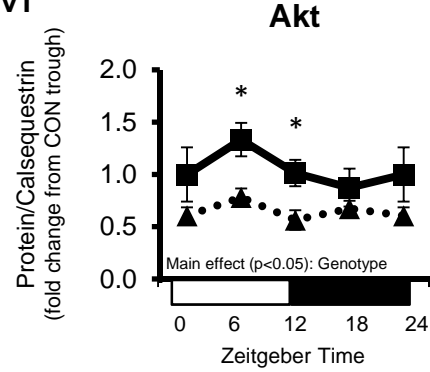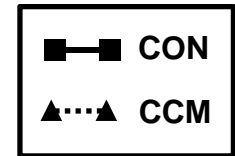

A

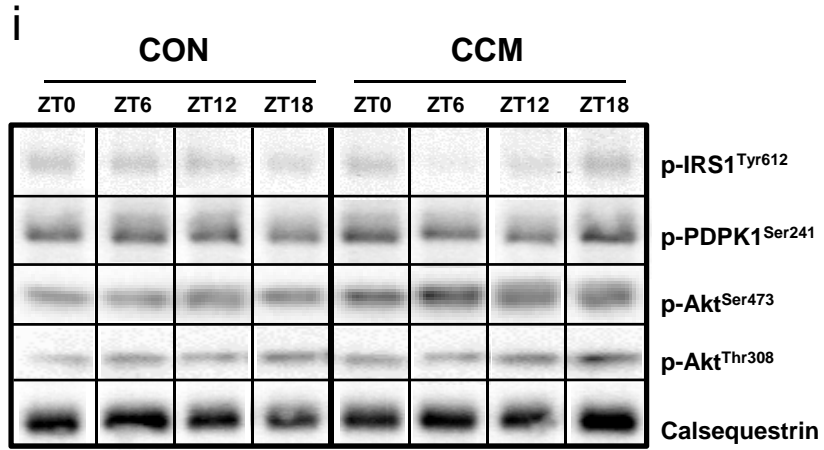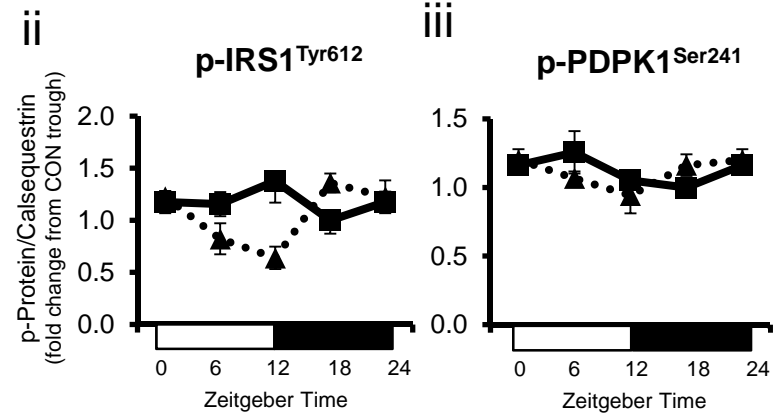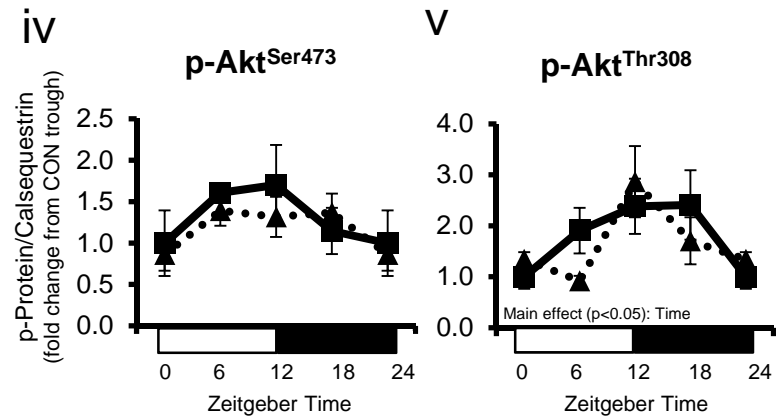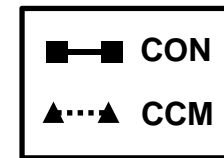

Supplemental Figure 2A

B

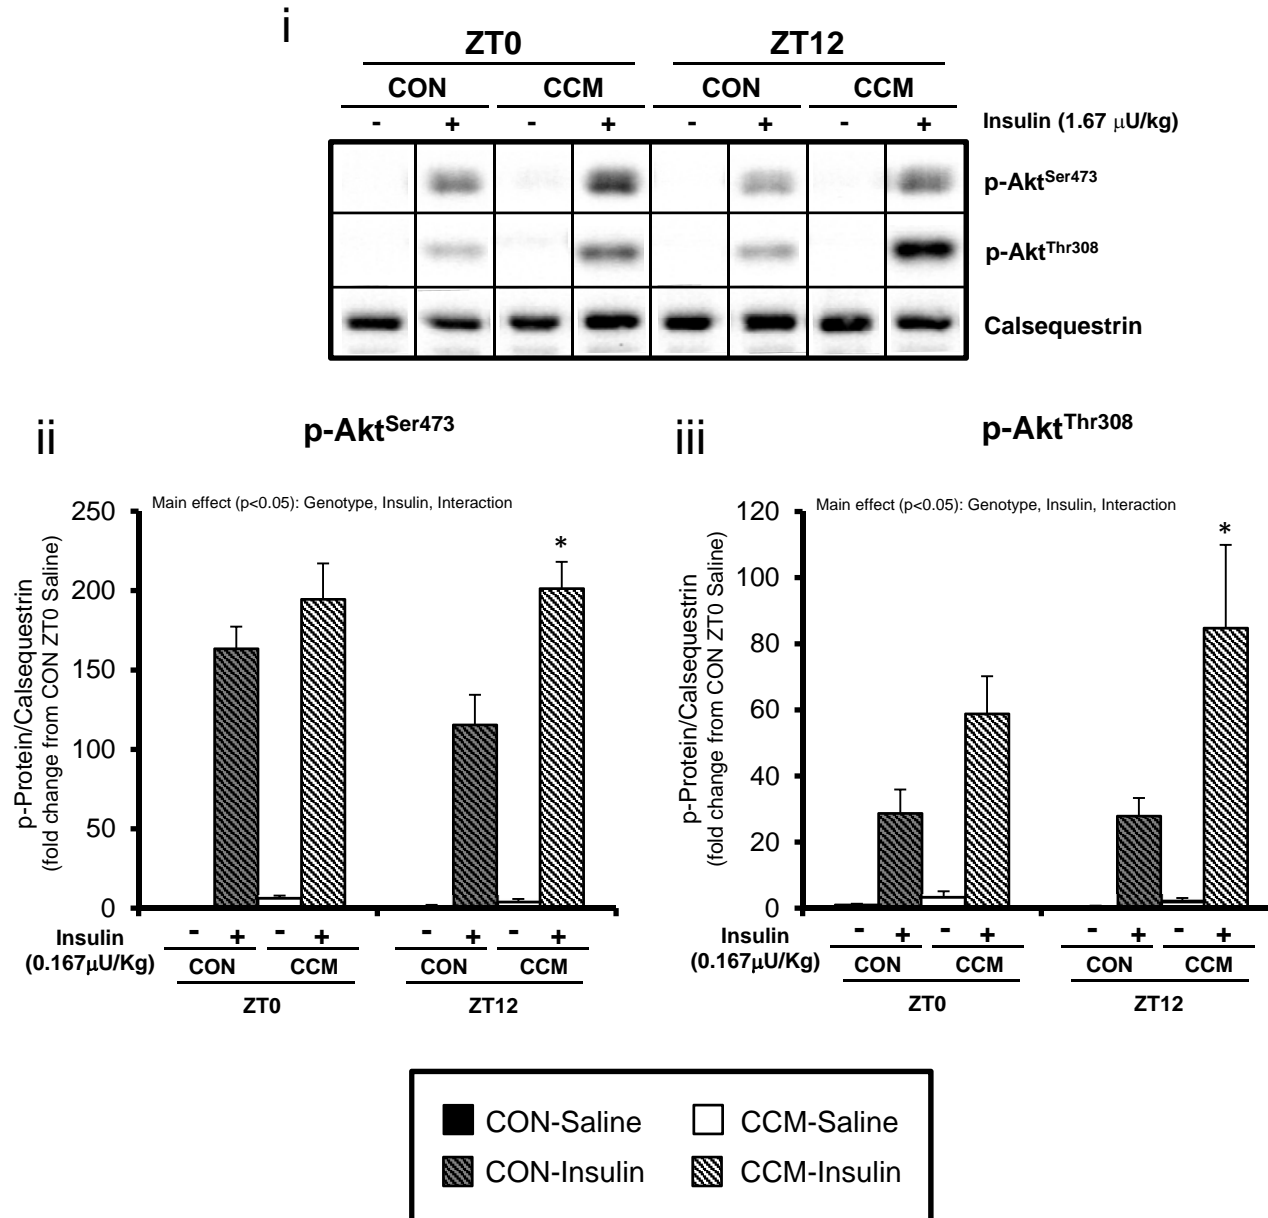

Supplemental Figure 2B

A

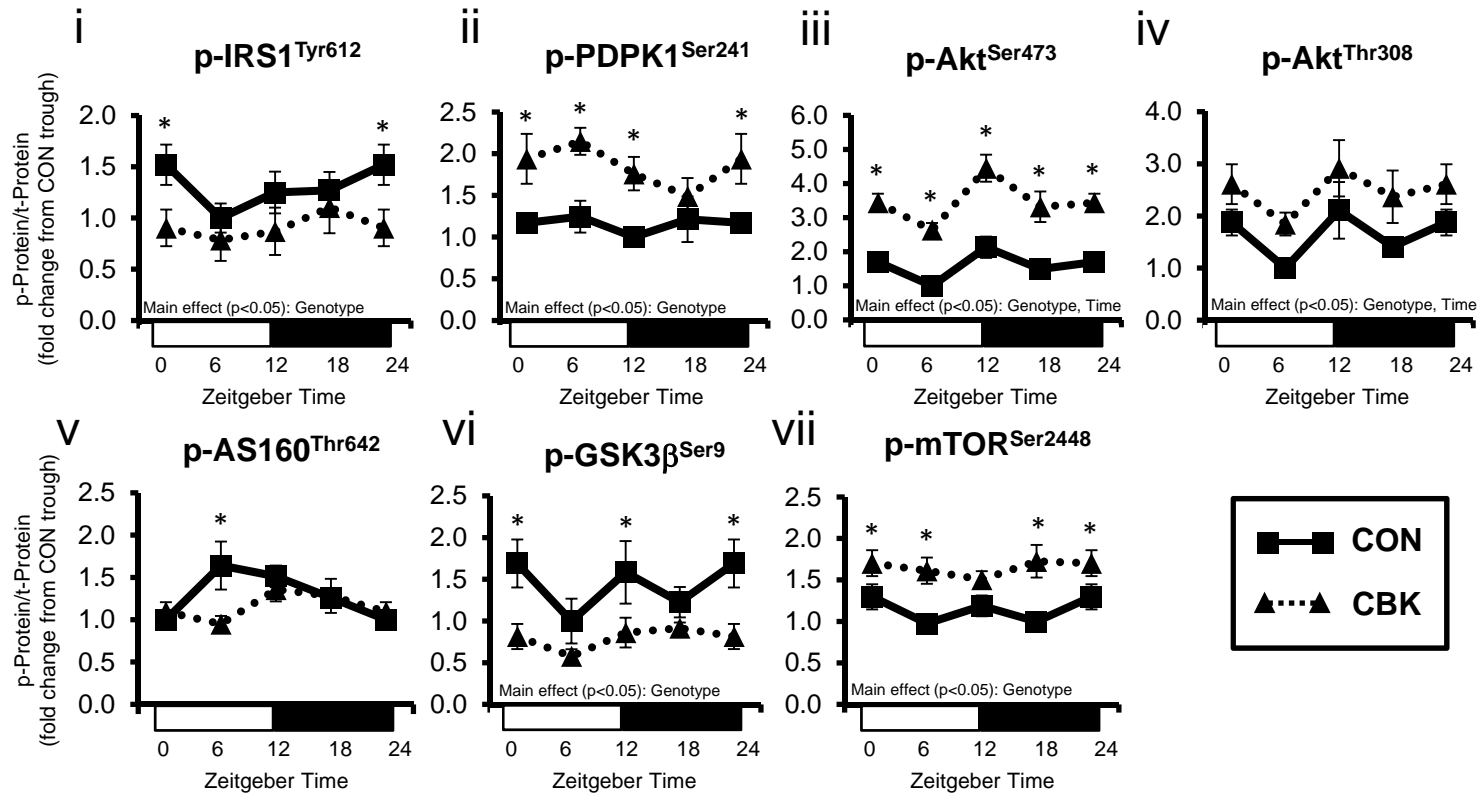

Supplemental Figure 3A

B

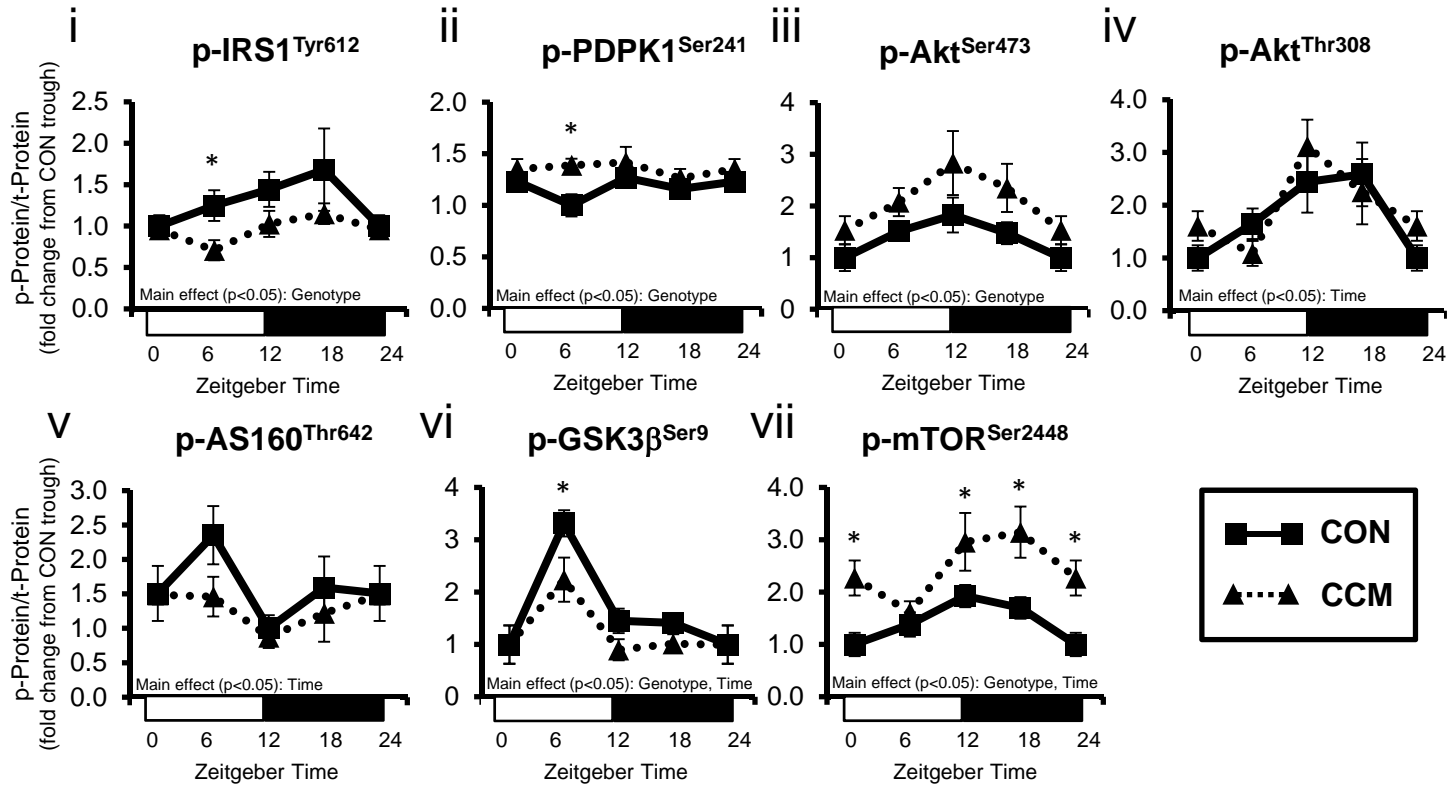

Supplemental Figure 3B

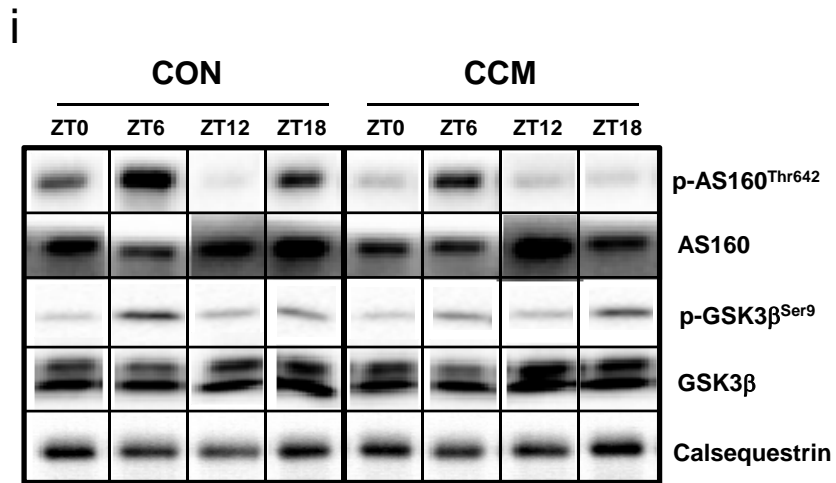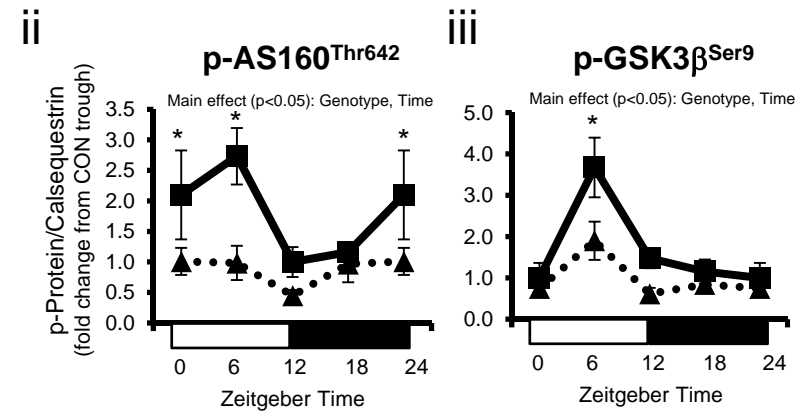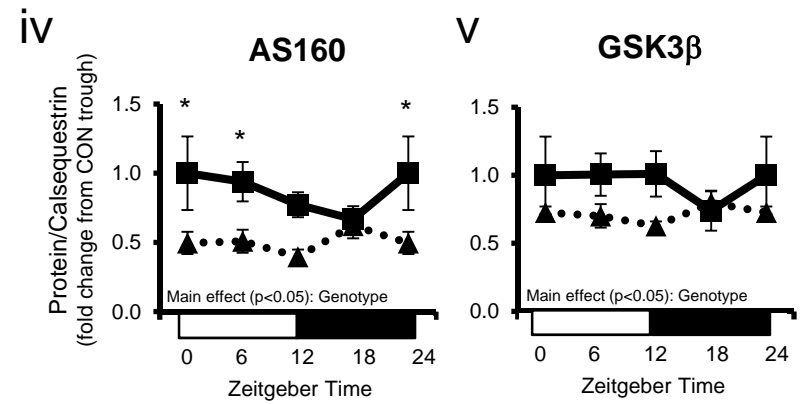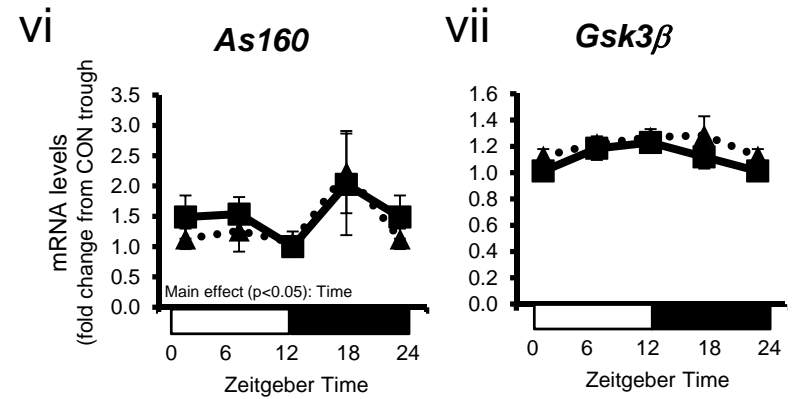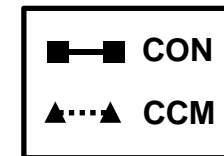

Supplemental Figure 4

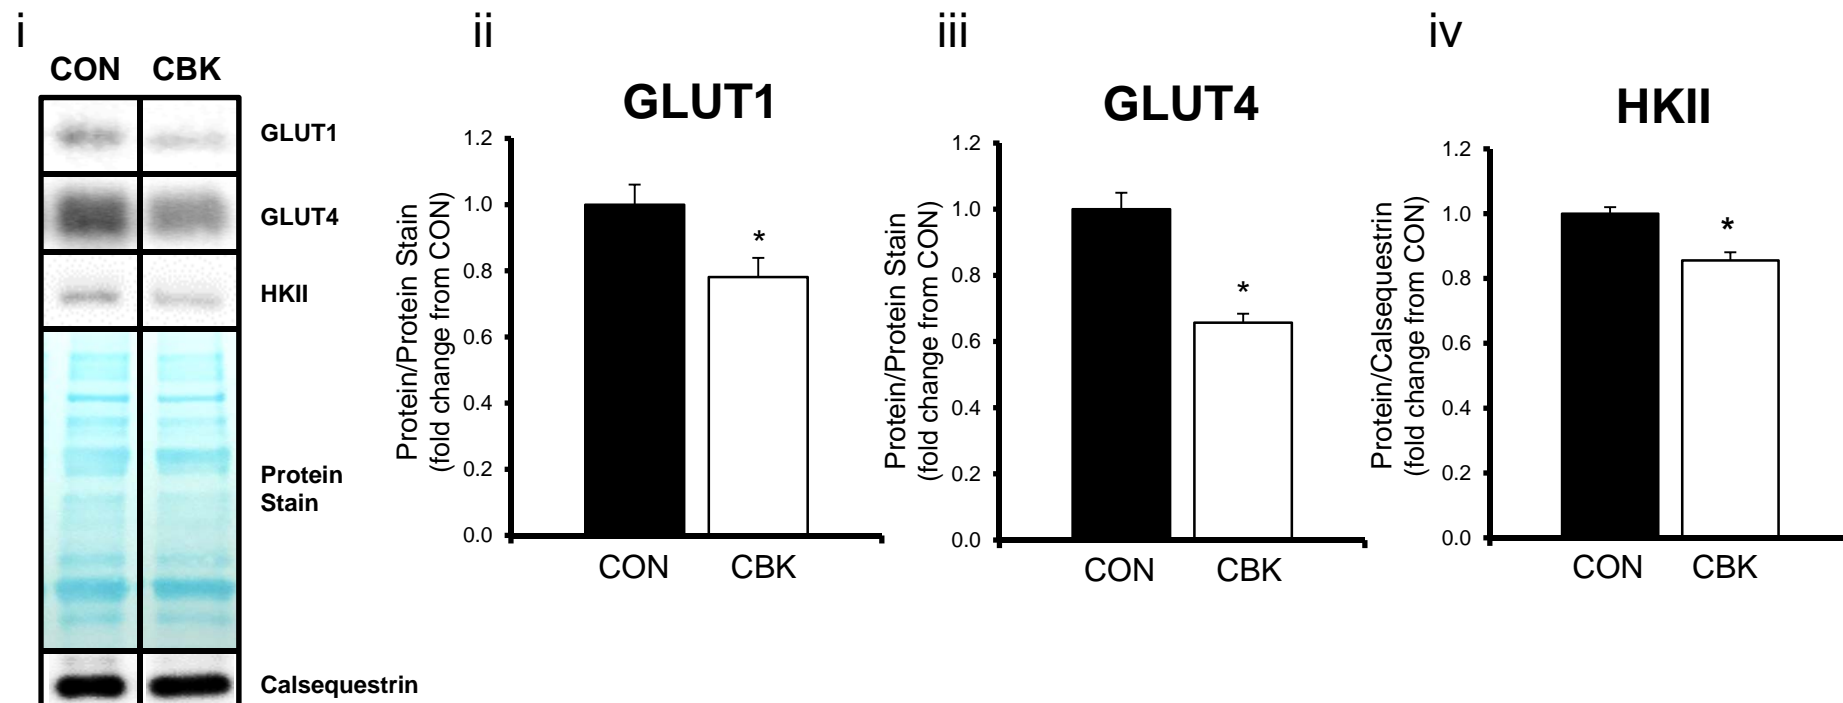

Supplemental Figure 5
